# Supplementary material for: Transcriptome-wide investigation of stop codon readthrough in Saccharomyces cerevisiae
Source: PubMed Central journal article supplement (PMC8087045; doi:10.1371/journal.pgen.1009538), 2021-04-20
Supplement: pgen.1009538.s004.pdf [file pgen.1009538.s004.pdf]

**S1 Table. Ribosome profiling data and yeast strains.**

| Sample                                                                  | SRR Run                                                     | Yeast strain                          | Notation in this paper | Genotype                                                                                                   | Culture media               | CHX in lysis buffer |
|-------------------------------------------------------------------------|-------------------------------------------------------------|---------------------------------------|------------------------|------------------------------------------------------------------------------------------------------------|-----------------------------|---------------------|
| <b><i>eRF1</i> temperature-sensitive mutant (This study): GSE162780</b> |                                                             |                                       |                        |                                                                                                            |                             |                     |
| GSM4959785,<br>GSM4959786,<br>GSM4959787,<br>GSM4959788                 | SRR13208091,<br>SRR13208092,<br>SRR13208093,<br>SRR13208094 | WT<br>(HFY114)                        | <i>SUP45</i>           | <i>MATa ade2-1 his3-11,15 leu2-3,112 trp1-1 ura3-1 can1-100</i>                                            | YPD                         | No                  |
| GSM4959789,<br>GSM4959790,<br>GSM4959791,<br>GSM4959792                 | SRR13208095,<br>SRR13208096,<br>SRR13208097,<br>SRR13208098 | <i>eRF1</i> ts<br>mutant<br>(HFY1218) | <i>sup45-ts</i>        | <i>MATa ade2-1 his3-11,15 leu2-3,112 trp1-1 ura3-1 can1-100 sup45-2</i>                                    | YPD                         | No                  |
| <b><i>eRF1</i> depletion (Wu et al., 2019): GSE115162</b>               |                                                             |                                       |                        |                                                                                                            |                             |                     |
| GSM3168380,<br>GSM3168381                                               | SRR7241903,<br>SRR7241904                                   | WT<br>(yCW30)                         | <i>SUP45-D</i>         | <i>MATa his3Δ1 leu2Δ0 met15Δ0 ura3Δ0 HO::ADH1p-OsTIR1-URA3</i>                                             | YPGR → YPD<br>+ 0.5mM auxin | Yes                 |
| GSM3168385,<br>GSM3168386                                               | SRR7241908,<br>SRR7241909                                   | <i>eRF1</i><br>depleted<br>(yKW13)    | <i>sup45-d</i>         | <i>MATa his3Δ1 leu2Δ0 met15Δ0 ura3Δ0 KanMX4:P<sub>GAL</sub>1-SUP45</i>                                     | YPGR → YPD                  | Yes                 |
| <b><i>Rli1</i> depletion (Young et al., 2015): GSE69414</b>             |                                                             |                                       |                        |                                                                                                            |                             |                     |
| GSM1700885                                                              | SRR2046309,<br>SRR2046310                                   | WT<br>(BY4741)                        | <i>RLI1-D</i>          | <i>MATa his3Δ1 leu2Δ0 met15Δ0 ura3Δ0</i>                                                                   | YPG → YPD                   | Yes                 |
| GSM1700886,<br>GSM1700891                                               | SRR2046311,<br>SRR2046312,<br>SRR2046319                    | <i>Rli1</i> depleted<br>(YDH369)      | <i>rli1-d</i>          | <i>MATa his3Δ1 leu2Δ0 met15Δ0 ura3Δ0 lys2Δ0 rli1Δ::kanMX4 pDH181 (P<sub>GAL</sub>-UBI-R-FH-RLI1, LEU2)</i> | YPG → YPD                   | Yes                 |
