# Supplementary material for: Transcriptome-wide investigation of stop codon readthrough in Saccharomyces cerevisiae
Source: PubMed Central journal article supplement (PMC8087045; doi:10.1371/journal.pgen.1009538), 2021-04-20
Supplement: pgen.1009538.s005.pdf [file pgen.1009538.s005.pdf]

**S2 Table. Number of genes involved in statistical analyses.**

| Sample                 | Regression | Classification |     |       |
|------------------------|------------|----------------|-----|-------|
|                        |            | High           | Low | Total |
| <i>SUP45</i> , 25°C    | 829        | 125            | 125 | 250   |
| <i>SUP45</i> , 37°C    | 565        | 85             | 85  | 170   |
| <i>sup45-ts</i> , 25°C | 1347       | 202            | 202 | 404   |
| <i>sup45-ts</i> , 37°C | 2484       | 373            | 373 | 746   |
| <i>SUP45-D</i>         | 975        | 147            | 147 | 294   |
| <i>sup45-d</i>         | 2146       | 322            | 322 | 644   |
| <i>RLI1-D</i>          | 937        | 141            | 141 | 282   |
| <i>rli1-d</i>          | 2007       | 301            | 301 | 602   |
