# Supplementary material for: Transcriptome-wide investigation of stop codon readthrough in Saccharomyces cerevisiae
Source: PubMed Central journal article supplement (PMC8087045; doi:10.1371/journal.pgen.1009538), 2021-04-20
Supplement: pgen.1009538.s006.pdf [file pgen.1009538.s006.pdf]

**S3 Table. Ribosome profiling reads processing and alignment statistics.**

| Sample                               | SRR Run     | Total reads processed | Reads $\geq$ 15 bp & contained adapters | Reads not aligned to ncRNAs* | Duplicate reads | Reads aligned to transcriptome |
|--------------------------------------|-------------|-----------------------|-----------------------------------------|------------------------------|-----------------|--------------------------------|
| <i>SUP45</i> , 25°C (replicate 1)    | SRR13208091 | 67,532,129            | 57,853,137                              | 25,787,398                   | 3,441,725       | 20,407,888                     |
| <i>SUP45</i> , 25°C (replicate 2)    | SRR13208092 | 61,556,833            | 51,451,140                              | 18,867,321                   | 7,016,422       | 10,101,506                     |
| <i>SUP45</i> , 37°C (replicate 1)    | SRR13208093 | 49,805,337            | 44,462,117                              | 14,274,514                   | 1,866,021       | 11,195,529                     |
| <i>SUP45</i> , 37°C (replicate 2)    | SRR13208094 | 64,613,280            | 55,971,740                              | 24,346,626                   | 5,660,607       | 16,685,974                     |
| <i>sup45-ts</i> , 25°C (replicate 1) | SRR13208095 | 91,931,471            | 70,972,671                              | 34,574,953                   | 5,747,485       | 24,437,810                     |
| <i>sup45-ts</i> , 25°C (replicate 2) | SRR13208096 | 60,891,476            | 49,432,024                              | 25,181,918                   | 4,148,599       | 18,939,808                     |
| <i>sup45-ts</i> , 37°C (replicate 1) | SRR13208097 | 77,154,540            | 55,550,470                              | 21,351,921                   | 3,510,551       | 14,378,321                     |
| <i>sup45-ts</i> , 37°C (replicate 2) | SRR13208098 | 66,416,665            | 48,944,777                              | 17,330,578                   | 3,701,109       | 10,930,634                     |
| <i>SUP45-D</i> (replicate 1)         | SRR7241903  | 54,157,010            | 53,979,859                              | 39,261,094                   | N/A             | 39,261,094                     |
| <i>SUP45-D</i> (replicate 2)         | SRR7241904  | 32,548,315            | 32,188,657                              | 21,139,968                   | N/A             | 21,139,968                     |
| <i>sup45-d</i> (replicate 1)         | SRR7241908  | 46,687,648            | 45,226,887                              | 34,527,078                   | N/A             | 34,527,078                     |
| <i>sup45-d</i> (replicate 2)         | SRR7241909  | 32,916,353            | 32,750,862                              | 20,325,474                   | N/A             | 20,325,474                     |
| <i>RLI1-D</i> (replicate 1)          | SRR2046309  | 52,021,032            | 51,768,936                              | 17,545,223                   | N/A             | 17,545,223                     |
| <i>RLI1-D</i> (replicate 2)          | SRR2046310  | 52,026,256            | 49,283,307                              | 41,880,568                   | N/A             | 41,880,568                     |
| <i>rli1-d</i> (replicate 1)          | SRR2046311  | 46,386,847            | 45,694,917                              | 15,064,692                   | N/A             | 15,064,692                     |
| <i>rli1-d</i> (replicate 2)          | SRR2046312  | 158,583,030           | 155,589,606                             | 53,259,434                   | N/A             | 53,259,434                     |
| <i>rli1-d</i> (replicate 3)          | SRR2046319  | 35,129,965            | 33,633,653                              | 28,658,467                   | N/A             | 28,658,467                     |

\*ncRNAs refer to non protein-coding RNAs
