# Supplementary material for: Transcriptome-wide investigation of stop codon readthrough in Saccharomyces cerevisiae
Source: PubMed Central journal article supplement (PMC8087045; doi:10.1371/journal.pgen.1009538), 2021-04-20
Supplement: pgen.1009538.s007.pdf [file pgen.1009538.s007.pdf]

**S4 Table. Offset from 5' and 3' ends of footprint to the first nucleotide in the P-site for each footprint length in each sample.**

| Sample                               | P-site Offset from 5'/3' ends for each footprint length (nt) |      |      |      |       |       |       |       |       |       |
|--------------------------------------|--------------------------------------------------------------|------|------|------|-------|-------|-------|-------|-------|-------|
|                                      | 20                                                           | 21   | 22   | 23   | 27    | 28    | 29    | 30    | 31    | 32    |
| <i>SUP45</i> , 25°C (replicate 1)    | 12/7                                                         | 13/7 | 13/8 | 14/8 | 11/15 | 12/15 | 13/15 | 13/16 | 13/17 | 13/18 |
| <i>SUP45</i> , 25°C (replicate 2)    | 12/7                                                         | 13/7 | 13/8 | 14/8 | 11/15 | 12/15 | 13/15 | 13/16 | 13/17 | 13/18 |
| <i>SUP45</i> , 37°C (replicate 1)    | 12/7                                                         | 13/7 | 13/8 | 13/9 | 11/15 | 12/15 | 13/15 | 13/16 | 13/17 | 13/18 |
| <i>SUP45</i> , 37°C (replicate 2)    | 12/7                                                         | 13/7 | 13/8 | 14/8 | 11/15 | 12/15 | 13/15 | 13/16 | 14/16 | 13/18 |
| <i>sup45-ts</i> , 25°C (replicate 1) | 12/7                                                         | 12/8 | 13/8 | 14/8 | 11/15 | 12/15 | 13/15 | 13/16 | 13/17 | 13/18 |
| <i>sup45-ts</i> , 25°C (replicate 2) | 12/7                                                         | 13/7 | 13/8 | 14/8 | 11/15 | 12/15 | 13/15 | 13/16 | 13/17 | 13/18 |
| <i>sup45-ts</i> , 37°C (replicate 1) | 12/7                                                         | 12/8 | 13/8 | 14/8 | 11/15 | 12/15 | 13/15 | 13/16 | 13/17 | 13/18 |
| <i>sup45-ts</i> , 37°C (replicate 2) | 12/7                                                         | 13/7 | 13/8 | 14/8 | 11/15 | 12/15 | 13/15 | 13/16 | 13/17 | 13/18 |
| <i>SUP45-D</i> (replicate 1)         | 13/6                                                         | 14/6 | 15/6 | 16/6 | 11/15 | 12/15 | 13/15 | 14/15 | 14/16 | 14/17 |
| <i>SUP45-D</i> (replicate 2)         | 13/6                                                         | 14/6 | 15/6 | 16/6 | 11/15 | 12/15 | 13/15 | 14/15 | 15/15 | 16/15 |
| <i>sup45-d</i> (replicate 1)         | 13/6                                                         | 14/6 | 15/6 | 16/6 | 11/15 | 12/15 | 13/15 | 14/15 | 14/16 | 14/17 |
| <i>sup45-d</i> (replicate 2)         | 13/6                                                         | 14/6 | 15/6 | 16/6 | 11/15 | 12/15 | 13/15 | 14/15 | 15/15 | 16/15 |
| <i>RLI1-D</i> (replicate 1)          | 4/15                                                         | 5/15 | 6/15 | 7/15 | 11/15 | 12/15 | 13/15 | 14/15 | 14/16 | 14/17 |
| <i>RLI1-D</i> (replicate 2)          | 4/15                                                         | 5/15 | 6/15 | 7/15 | 11/15 | 12/15 | 13/15 | 14/15 | 15/15 | 16/15 |
| <i>rli1-d</i> (replicate 1)          | 4/15                                                         | 5/15 | 6/15 | 7/15 | 11/15 | 12/15 | 13/15 | 14/15 | 14/16 | 14/17 |
| <i>rli1-d</i> (replicate 2)          | 4/15                                                         | 5/15 | 6/15 | 7/15 | 11/15 | 12/15 | 13/15 | 14/15 | 14/16 | 14/17 |
| <i>rli1-d</i> (replicate 3)          | 4/15                                                         | 5/15 | 6/15 | 7/15 | 11/15 | 12/15 | 13/15 | 14/15 | 15/15 | 16/15 |
